# Supplementary material
Source: publisher figshare collection journal article supplement (https://asha.figshare.com/ndownloader/files/23078027)
Supplement: Supplementary file 1 [file 23078027]

### **HLE (Home Literacy Environment) Items**

48. How many times did you read to your child last week?
49. How many times did your child ask to be read to last week?
50. How many times did your child look at books on his/her own last week?
51. How many times did your child listen to stories on cassettes, CD, DVD, and/or videos last week?
52. How many times did I teach my child about letters in the book?
53. How many times did I teach my child about words in the book?
54. How many times did you go to the library or bookstore with your child in the last month?
55. How often did your child look at or read a children's magazine in the last month?
56. How often did an adult teach your child about reading and writing in the last month?
57. How often did your child ask a family member to write your child's name in the last month?
58. How often did your child ask for help to read a word or two in the last month?
